# Supplementary material for: Large Scale Vat-Photopolymerization of Investment Casting Master Patterns: The Total Solution
Source: MDPI journal article supplement (doi:10.3390/polym14214593), 2022-10-29
Supplement: s1 [file s1]

a)

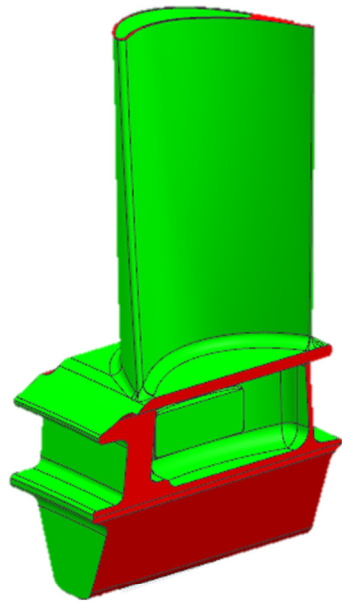

b)

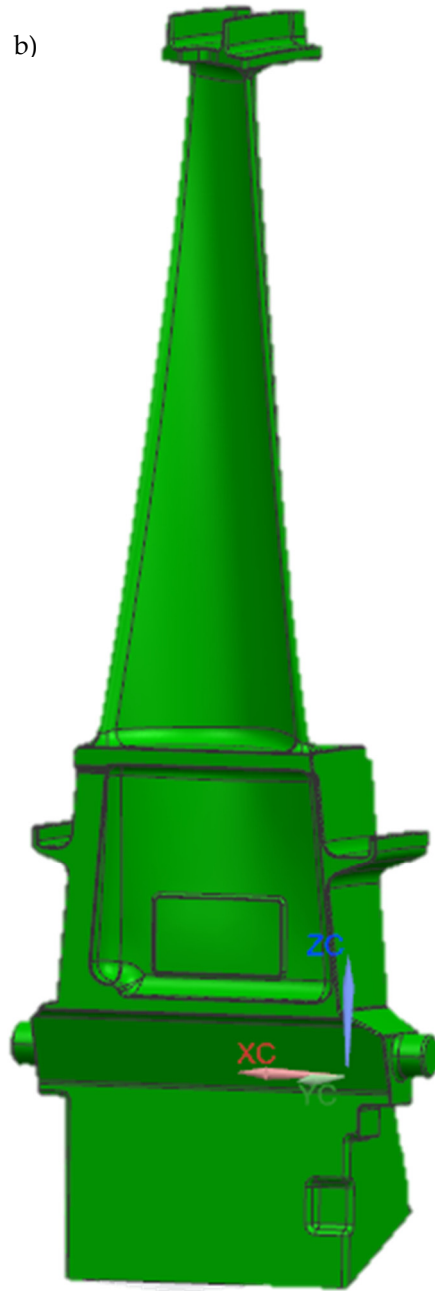

**Figure S1** Two typical solid blade geometries for (a) Dimensional measurements, and (b) Burnout experiments.

**Table S1** Dimensional deviations the turbine blade printed using A40W50 mixture over a 21-day period. Part is in its green (unpost-cured) condition.

|             |        | A40W50 |        |        |        |
|-------------|--------|--------|--------|--------|--------|
| Section 1   | #Point | Day 0  | Day 7  | Day 14 | Day 21 |
|             | 1      | -85    | -200   | -55    | -62    |
|             | 2      | -29    | -53    | 35     | 46     |
|             | 3      | 15     | -35    | 180    | 168    |
|             | 4      | 1      | -47    | 264    | 222    |
|             | 5      | -18    | -99    | 44     | 36     |
|             | 6      | 108    | 131    | 169    | 189    |
|             | 7      | 84     | 57     | 74     | 101    |
|             | 8      | 116    | 100    | 46     | 87     |
|             | 9      | 56     | 95     | 24     | 64     |
| Section 2   | 10     | -73    | -111   | -119   | -105   |
|             | 11     | 71     | 15     | 172    | 178    |
|             | 12     | 16     | 20     | 81     | 108    |
|             | 13     | 126    | 127    | 265    | 247    |
|             | 14     | 241    | 220    | 317    | 232    |
|             | 15     | -8     | -30    | -17    | -41    |
|             | 16     | -237   | -276   | -225   | -263   |
|             | 17     | 22     | -13    | -29    | -3     |
|             | 18     | 112    | 50     | 44     | 44     |
|             | 19     | -11    | -60    | 38     | 41     |
| Average (+) |        | 69.40  | 90.56  | 125.21 | 125.93 |
| Average (-) |        | -65.86 | -92.40 | -89.00 | -94.80 |

**Table S2** Dimensional deviations the turbine blade printed using A40W50 mixture over a 21-day period.  
Part is in its post-cured (A40W50-PC) condition.

|             |        | A40W50-PC |         |         |        |        |
|-------------|--------|-----------|---------|---------|--------|--------|
| Section 1   | #Point | Before PC | Day 0   | Day 7   | Day 14 | Day 21 |
|             | 1      | -164      | -278    | -249    | -149   | -191   |
|             | 2      | -18       | -90     | -67     | 6      | -1     |
|             | 3      | -60       | -61     | -59     | -57    | -55    |
|             | 4      | -56       | -77     | -69     | -41    | -66    |
|             | 5      | -46       | -130    | -132    | -67    | -91    |
|             | 6      | 87        | 155     | 135     | 84     | 107    |
|             | 7      | 69        | 101     | 55      | 36     | 60     |
|             | 8      | 133       | 138     | 100     | 79     | 135    |
|             | 9      | 139       | 98      | 90      | 129    | 161    |
| Section 2   | 10     | -108      | -169    | -161    | -99    | -133   |
|             | 11     | -15       | -6      | -5      | 30     | -8     |
|             | 12     | -13       | 3       | 6       | 17     | 13     |
|             | 13     | 93        | 142     | 114     | 117    | 100    |
|             | 14     | 228       | 237     | 203     | 210    | 215    |
|             | 15     | -51       | -44     | -43     | -37    | -43    |
|             | 16     | -250      | -292    | -289    | -296   | -286   |
|             | 17     | 34        | -19     | -25     | -16    | 8      |
|             | 18     | 94        | 10      | 31      | 60     | 63     |
|             | 19     | -53       | -68     | -66     | -28    | -25    |
| Average (+) |        | 109.63    | 110.50  | 91.75   | 76.80  | 95.78  |
| Average (-) |        | -75.82    | -112.18 | -105.91 | -87.78 | -89.90 |
